# Supplementary material for: Prognostic value of the REBECCA prognostic score and the Tabernero classification in refractory metastatic colorectal cancer treated with regorafenib: a multicenter real-world study
Source: Research Square preprint supplement (doi:10.21203/rs.3.rs-8357626/v1), 2025-12-22
Supplement: Supplementary file 1 [file 071f9b21889455b07ef7411d.docx]

**ESMO-GROW Flowchart – CORE Study**

Flow of patient selection and inclusion in the study:

1. Patients assessed for eligibility: 130
2. Patients excluded: 0
3. Patients included in the final analysis: 130
4. Patients evaluable for REBECCA prognostic score: 129 (ECOG PS missing in 1 patient)
