# Supplementary material for: Prognostic value of the REBECCA prognostic score and the Tabernero classification in refractory metastatic colorectal cancer treated with regorafenib: a multicenter real-world study
Source: Research Square preprint supplement (doi:10.21203/rs.3.rs-8357626/v1), 2025-12-22
Supplement: Supplementary file 2 [file 75d23b6a0786369158a6c5e3.docx]

**ESMO-GROW Checklist – CORE Study**

**1. Study rationale and objectives**

Clearly stated objectives and rationale for conducting the RWD study — Fully reported

**2. Study design and setting**

Study design clearly described (e.g., retrospective, prospective, cohort, case-control, etc.) — Fully reported

Setting and data sources clearly described — Fully reported

Geographical location and participating centers specified — Fully reported

Time period of study defined — Fully reported

**3. Participants**

Eligibility criteria clearly defined — Fully reported

Patient selection process described — Fully reported

Flowchart of inclusion provided — Fully reported

**4. Variables and data sources**

Exposure/intervention clearly defined (e.g., treatment under study) — Fully reported

Outcomes of interest clearly defined (OS, PFS, etc.) — Fully reported

Handling of missing data described — Fully reported

Use of EHR or clinical records as data source specified — Fully reported

**5. Statistical methods**

Statistical methods clearly described — Fully reported

Sensitivity analyses performed — Not applicable (external validation study without model development)

**6. Results**

Patient characteristics and baseline data reported — Fully reported

Number of events and censoring reported — Fully reported

Missing data reported — Fully reported

**7. Discussion**

Interpretation of findings, clinical relevance and limitations discussed — Fully reported

Generalizability of results addressed — Fully reported

**8. Other information**

Ethics approval and consent to participate reported — Fully reported

Conflict of interest and funding disclosed — Fully reported
